# Supplementary material
Source: Royal Society of Chemistry journal article supplement (doi:10.1039/d6dt01105e)
Supplement: d6dt01105e1.pdf [file d6dt01105e1.pdf]

## Supporting Information

### Oxygen Vacancies Assisted 3DOM TiO<sub>2</sub>-Zn<sub>x</sub>Cd<sub>1-x</sub>S Heterojunctions for Enhanced Photocatalytic Hydrogen Production

Han Li<sup>a</sup>, Zhen-Li Zhao<sup>a</sup>, Jun Chen<sup>a</sup>, Lin-Dong Wang<sup>a,b</sup>, Yao Rong<sup>a</sup>, Jia-Min Lyu<sup>a\*</sup>, Jing Liu<sup>a,\*</sup>,  
Zhi-Yi Hu<sup>a,b</sup>, Hemdan S. H. Mohamed<sup>c</sup>, Li-Hua Chen<sup>a</sup>, Yu Li<sup>a,\*</sup>, Bao-Lian Su<sup>a,d\*</sup>

<sup>a</sup> State Key Laboratory of Advanced Technology for Materials Synthesis and Processing,  
Wuhan University of Technology, 122 Luoshi Road, 430070 Wuhan, Hubei, China.

<sup>b</sup> Nanostructure Research Centre (NRC), Wuhan University of Technology, 122 Luoshi Road,  
430070 Wuhan, Hubei, China.

<sup>c</sup> Physics Department, Faculty of Science, Fayoum University, El Gomhoria Street, 63514  
Fayoum, Egypt.

<sup>d</sup> Laboratory of Inorganic Materials Chemistry (CMI), University of Namur, 61 rue de  
Bruxelles, B-5000 Namur, Belgium.

\*Corresponding authors. E-mail addresses: [lvjiamin@whut.edu.cn](mailto:lvjiamin@whut.edu.cn) (J. M. Lv),  
[liu\\_jing@whut.edu.cn](mailto:liu_jing@whut.edu.cn) (J. Liu), [yu.li@whut.edu.cn](mailto:yu.li@whut.edu.cn) (Y. Li), [bao-lian.su@unamur.be](mailto:bao-lian.su@unamur.be) (B. L. Su)

The AQY was calculated according to the equation<sup>1</sup>:

$$\begin{aligned} \text{AQY (\%)} &= [\text{Number of the reacted electrons}] / [\text{Number of incident photons}] \times 100 \\ &= [\text{Number of evolved hydrogen molecules} \times 2] / [\text{Number of incident photons}] \times 100 \end{aligned}$$

$$\text{Number of evolved hydrogen molecules} = N_{\text{H}_2} \times N_{\text{A}}$$

$$\text{Number of incident photons} = P \times S \times \lambda \times t / (h \times c)$$

The factor of 2 accounts for the two electrons required per H<sub>2</sub> molecule

$N_{\text{H}_2}$  = amount of H<sub>2</sub> produced (mmol), derived from GC quantification

$N_{\text{A}}$  = Avogadro's constant ( $6.02 \times 10^{23} \text{ mol}^{-1}$ )

$P$  = average light intensity at the sample surface ( $\text{W}/\text{cm}^2$ ), measured as the mean of the center and edge values at 365 nm

$S$  = irradiated area of the reactor =  $38.5 \text{ cm}^2$  ( $d = 7 \text{ cm}$ )

$\lambda$  = incident wavelength = 365 nm ( $3.65 \times 10^{-7} \text{ m}$ )

$t$  = irradiation time = 3600 s (1 h)

$h$  = Planck's constant ( $6.626 \times 10^{-34} \text{ J}\cdot\text{s}$ )

$c$  = speed of light ( $3 \times 10^8 \text{ m/s}$ )

For the optimal 3DOM TiO<sub>2</sub>-Zn<sub>0.5</sub>Cd<sub>0.5</sub>S sample under 365 nm irradiation, the measured light intensities were 0.86 W (center) and 0.276 W (edge).

$$\text{Average intensity} = (1/3 \times \text{center intensity} + 2/3 \times \text{edge intensity}) / (3.58 \times 3.14)$$

The average intensity is calculated to be  $0.04187 \text{ W}/\text{cm}^2$ . The hydrogen production rate was  $7.48 \text{ mmol}\cdot\text{g}^{-1}\cdot\text{h}^{-1}$ , yielding an AQY of 84.5%.

We confirm that the light intensity was carefully measured at multiple positions (center and edge) across the reactor surface. These computational details have been added to the Supporting Information.

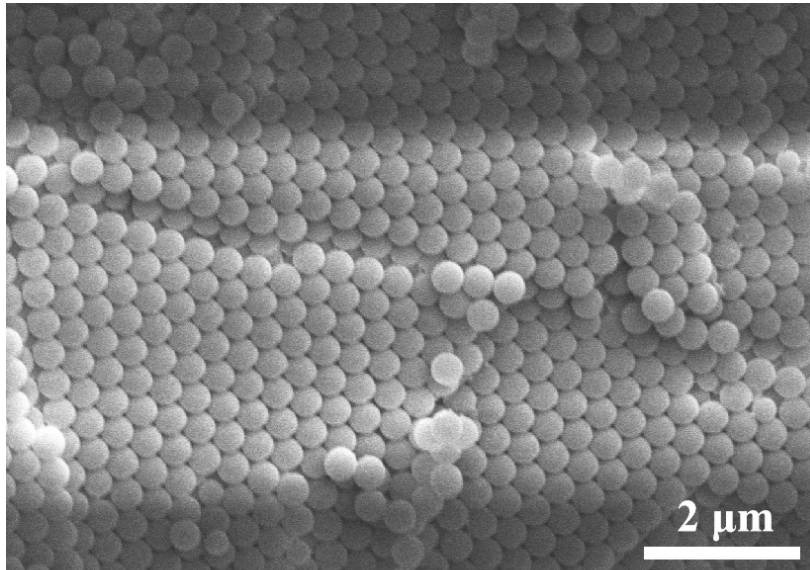

**Fig. S1.** SEM images of the samples PS template.

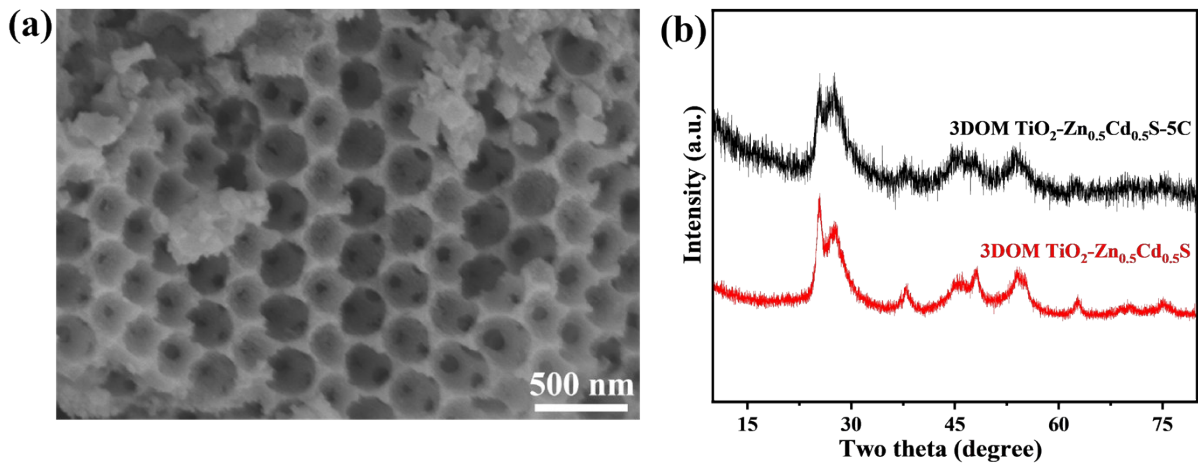

**Fig. S2.** (a) SEM of 3DOM  $\text{TiO}_2\text{-Zn}_{0.5}\text{Cd}_{0.5}\text{S-5C}$  and (b) XRD of 3DOM  $\text{TiO}_2\text{-Zn}_{0.5}\text{Cd}_{0.5}\text{S-5C}$  and 3DOM  $\text{TiO}_2\text{-Zn}_{0.5}\text{Cd}_{0.5}\text{S}$ .

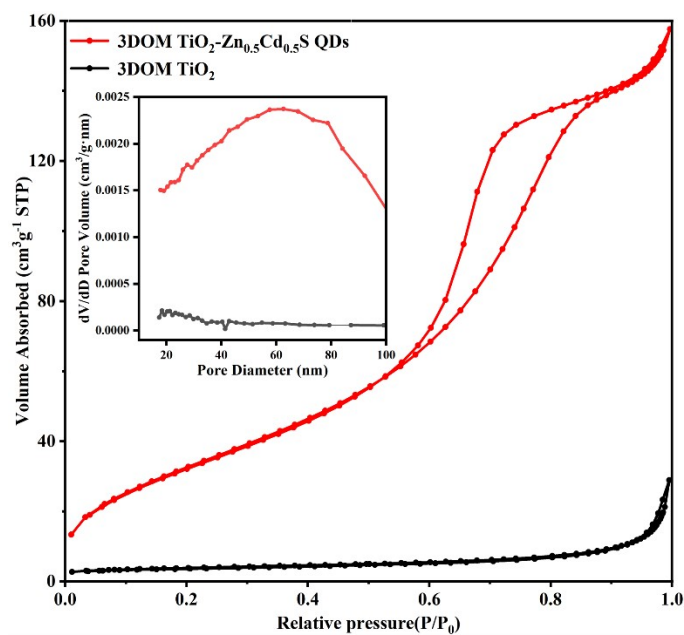

**Fig. S3.** N<sub>2</sub> absorption-desorption curves and corresponding pore size distribution of the 3DOM TiO<sub>2</sub>-Zn<sub>0.5</sub>Cd<sub>0.5</sub>S and 3DOM TiO<sub>2</sub>.

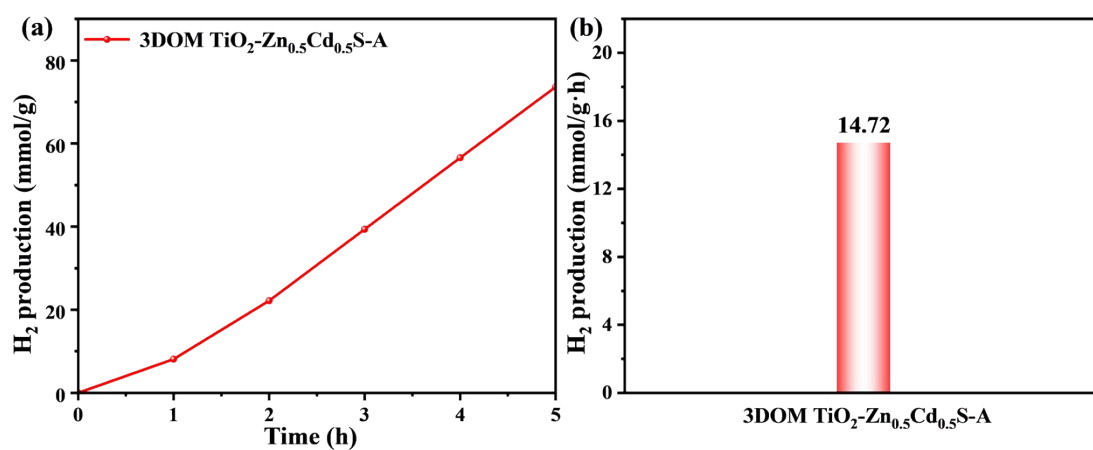

**Fig. S4.** (a) Hydrogen production amount within 5 hours, (b) Hydrogen production rate of 3DOM TiO<sub>2</sub>-Zn<sub>0.5</sub>Cd<sub>0.5</sub>S-A.

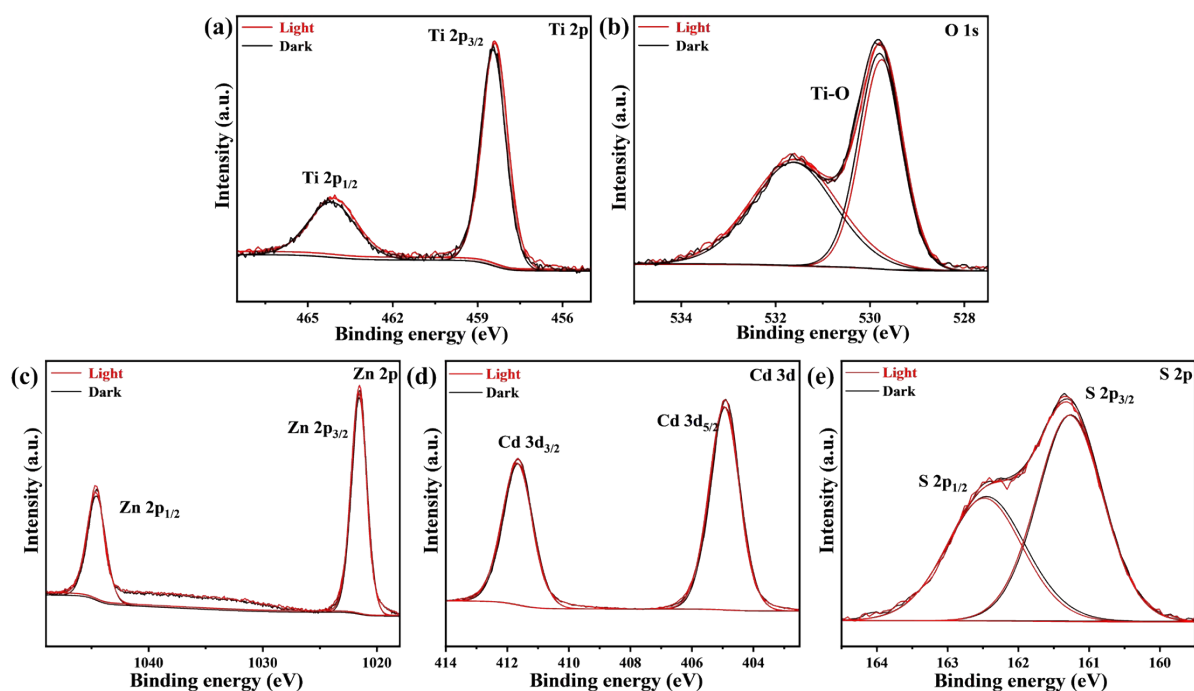

**Fig. S5.** High-resolution XPS spectra of (a) Ti 2p, (b) O 1s, (c) Zn 2p, (d) Cd 3d, and (e) S 2p of 3DOM TiO<sub>2</sub>-Zn<sub>0.5</sub>Cd<sub>0.5</sub>S with and without light irradiation.

Note: The sample was first characterized under dark conditions to obtain the reference spectra. Subsequently, the sample was irradiated in situ using a 300 W Xe lamp for 10 minutes, after which the XPS spectra were immediately acquired under the same conditions.

**TableS1.** ICP test of the sample.

| Sample                                                       | Zn (%) | Cd (%) | S (%) | Ti (%) |
|--------------------------------------------------------------|--------|--------|-------|--------|
| 3DOM TiO <sub>2</sub> -Zn <sub>0.5</sub> Cd <sub>0.5</sub> S | 18.16  | 18.19  | 16.87 | 46.78  |

**Table S2.** Comparison of photocatalytic H<sub>2</sub> production performance between our work and other reported results.

| Samples                                                                                | Hydrogen Production System                                           | H <sub>2</sub> Rate<br>(mmol • g <sup>-1</sup> • h <sup>-1</sup> ) | References      |
|----------------------------------------------------------------------------------------|----------------------------------------------------------------------|--------------------------------------------------------------------|-----------------|
| <b>3DOM TiO<sub>2</sub>-Zn<sub>0.5</sub>Cd<sub>0.5</sub>S</b>                          | <b>20 % Methanol</b>                                                 | <b>20.33</b>                                                       | <b>Our work</b> |
| 20 %-ZnCdS/O <sub>V</sub> -NiCo <sub>2</sub> O <sub>4</sub>                            | 0.35 M Na <sub>2</sub> S/0.25 M Na <sub>2</sub> SO <sub>3</sub>      | 8.44                                                               | 2               |
| CoWO <sub>4</sub> /V <sub>Zn</sub> -Zn <sub>0.3</sub> Cd <sub>0.7</sub> S              | Cl-PhCH <sub>2</sub> OH/DMF                                          | 15.58                                                              | 3               |
| TiO <sub>2</sub> -Zn <sub>0.5</sub> Cd <sub>0.5</sub> S                                | 0.35 M Na <sub>2</sub> S/0.25 M Na <sub>2</sub> SO <sub>3</sub>      | 16.68                                                              | 4               |
| HAu/3DOM-TiO <sub>2</sub>                                                              | Methanol                                                             | 6.42                                                               | 5               |
| 3DOM LaFeO <sub>3</sub> /Cd <sub>0.7</sub> Zn <sub>0.3</sub> S                         | Na <sub>2</sub> S/Na <sub>2</sub> SO <sub>3</sub>                    | 0.28                                                               | 6               |
| 3DOM TiO <sub>2</sub> -g-C <sub>3</sub> N <sub>4</sub> -Cu <sub>2</sub> O <sub>2</sub> | 10 % Triethanolamine                                                 | 12.11                                                              | 7               |
| 3DOM In <sub>2</sub> O <sub>3</sub> -TiO <sub>2</sub>                                  | Methanol                                                             | 0.43                                                               | 8               |
| 3DOM N/TiO <sub>2</sub> -CdS QDs                                                       | Na <sub>2</sub> S • H <sub>2</sub> O/Na <sub>2</sub> SO <sub>3</sub> | 2.08                                                               | 9               |
| 3DOM SrTiO <sub>3</sub> -TiO <sub>2</sub> /CQDs                                        | Na <sub>2</sub> S/Na <sub>2</sub> SO <sub>3</sub>                    | 0.58                                                               | 10              |
| RGO/TiO <sub>2-x</sub>                                                                 | Glycerol                                                             | 13.6                                                               | 11              |
| O <sub>Vs</sub> -TiO <sub>2</sub> -NiS                                                 | 20 % Methanol                                                        | 3.95                                                               | 12              |

**Table S3.** Mesoporous parameters of the 3DOM TiO<sub>2</sub>-Zn<sub>0.5</sub>Cd<sub>0.5</sub>S and 3DOM TiO<sub>2</sub>.

| Samples                                                       | Surface Area<br>(m <sup>2</sup> • g <sup>-1</sup> ) | Pore Volume<br>(cm <sup>3</sup> • g <sup>-1</sup> ) | Pore Size<br>(nm) |
|---------------------------------------------------------------|-----------------------------------------------------|-----------------------------------------------------|-------------------|
| 3DOM TiO <sub>2</sub> - Zn <sub>0.5</sub> Cd <sub>0.5</sub> S | 129.11                                              | 0.23                                                | 54.16             |
| 3DOM TiO <sub>2</sub>                                         | 12.77                                               | 0.04                                                | 150.94            |

## References

- 1 Determination of Energy Conversion Efficiency and Quantum Yield for Hydrogen Production in the Solar Photocatalytic Water Splitting System. General Administration of Quality Supervision, Inspection and Quarantine of the People's Republic of China and National Standards of People's Republic of China, PRC, 2011, GB/T 26915.
- 2 X. Guo, Built-in Electric Field and Oxygen Vacancy Defects in ZnCdS/Ov-NiCo<sub>2</sub>O<sub>4</sub> Schottky Heterojunction to Achieve Efficient Photocatalytic Hydrogen Evolution, *Environ. Energy*, 2025.
- 3 L. Li, K. Kuang, X. Zheng, J. Wang, W. Ren, J. Ge, S. Zhang and S. Chen, Design of p–n Heterojunction between CoWO<sub>4</sub> and Zn-Defective Zn<sub>0.3</sub>Cd<sub>0.7</sub>S for Efficient Photocatalytic H<sub>2</sub> Evolution, *J. Colloid Interface Sci.*, 2024, **663**, 981–991.
- 4 Y. Zhou, A. Shui, M. Cai and H. Yu, Synthesis, Photocatalytic Hydrogen Evolution Performance of Zn<sub>0.5</sub>Cd<sub>0.5</sub>S/TiO<sub>2</sub> S-Scheme Heterojunction Nanofibers, *International Journal of Hydrogen Energy*, 2025, **145**, 36–44.
- 5 Y. Chang, Y. Xuan, H. Quan, H. Zhang, S. Liu, Z. Li, K. Yu and J. Cao, Hydrogen Treated Au/3DOM-TiO<sub>2</sub> with Promoted Photocatalytic Efficiency for Hydrogen Evolution from Water Splitting, *Chem. Eng. J.*, 2020, **382**, 122869.
- 6 W. Zhang, Y. Zi, X. Bai, I. Khan, A. Ullah, Y. Liu, A. Huang, J. Qiu, Y. Cun and Z. Yang, Z-Scheme LaFeO<sub>3</sub>/Cd<sub>0.7</sub>Zn<sub>0.3</sub>S Heterojunction Based on 3DOM LaFeO<sub>3</sub> Perovskite for Enhanced Photocatalytic Hydrogen Activity, *Environ. Chem. Eng.*, 2024, **12**, 114276.
- 7 B. Chen, J. Yu, R. Wang, X. Zhang, B. He, J. Jin, H. Wang and Y. Gong, Three-Dimensional Ordered Macroporous g-C<sub>3</sub>N<sub>4</sub>-Cu<sub>2</sub>O-TiO<sub>2</sub> Heterojunction for Enhanced

- Hydrogen Production, *Sci. China Mater.*, 2022, **65**, 139–146.
- 8 Y. Huo, Y. Tian, T. Hu, M. Yang, Y. Yu, Y. Liu, J. Hou and L. Li, CdS-Loaded Three-Dimensional Ordered Macroporous Composite Material In<sub>2</sub>O<sub>3</sub>-TiO<sub>2</sub>: Construction of Type II Heterostructure and Enhancement of Photocatalytic Performance, *Applied Catalysis A: General*, 2023, **652**, 119042.
  - 9 Y. Zhu, Y. Tian, L. Li, J. Hou, Y. Huo, T. Sun and J. Li, 3DOM N/TiO<sub>2</sub> Composite Modified by CdS QDs with Z-Scheme: Enhanced Photocatalytic Degradation and Hydrogen Evolution, *J. Nanopart Res.*, 2022, **24**, 168.
  - 10 Y. Li, Y. Sun, T. Hu, L. Li, Y. Liu, X. Gao, Z. Cao, L. Wang and Y. Cao, 3DOM SrTiO<sub>3</sub>-TiO<sub>2</sub> Composite Material Modified by CQDs with up-Conversion Characteristics: Enhanced Photocatalytic Degradation and Photolysis of Water for Hydrogen Production, *Colloids and Surfaces A: Physicochemical and Engineering Aspects*, 2023, **674**, 131896.
  - 11 J.B. S., M. Muniyappa, N.R. V., R. Mudike, M. Shastri, S. Tathagata, P.D. Shivaramu, S. M.V., A.K. C.S. and D. Rangappa, Enhanced Photocatalytic Hydrogen Evolution from Reduced Graphene Oxide-Defect Rich TiO<sub>2</sub>-x Nanocomposites, *International Journal of Hydrogen Energy*, 2022, **47**, 40242–40253.
  - 12 P. Qiao, J. Wu, H. Li, Y. Xu, B. Sun, L. Ren, K. Pan, L. Wang and W. Zhou, Improved Charge Separation of NiS Nanoparticles Modified Defect-Engineered Black TiO<sub>2</sub> Hollow Nanotubes for Boosting Solar-Driven Photocatalytic H<sub>2</sub> Evolution, *Nanotechnology*, 2019, **30**, 125703.
